# Supplementary material for: Antimicrobial Susceptibility Profiles and Molecular Characterisation of Staphylococcus aureus from Pigs and Workers at Farms and Abattoirs in Zambia
Source: MDPI journal article supplement (doi:10.3390/antibiotics11070844), 2022-06-24
Supplement: s1 [file s1]

Table S1: Samples for which more than one *S. aureus* colony type was isolated

| Study No.    | District | Study Site | Type of Facility | Species | Sample Type    | S.aureus Isolation |
|--------------|----------|------------|------------------|---------|----------------|--------------------|
| P4-4-1       | Lusaka   | Farm 4     | Small Scale      | Pig     | Pig nasal swab | Yes                |
| P4-8-1       | Lusaka   | Farm 4     | Small Scale      | Pig     | Pig nasal swab | Yes                |
| P5-14-1      | Lusaka   | Farm 5     | Small Scale      | Pig     | Pig nasal swab | Yes                |
| P6-8-1       | Chongwe  | Farm 6     | Medium Scale     | Pig     | Pig nasal swab | Yes                |
| P7-3-1       | Chongwe  | Farm 7     | Medium Scale     | Pig     | Pig nasal swab | Yes                |
| P10-4-1      | Chongwe  | Farm 10    | Medium Scale     | Pig     | Pig nasal swab | Yes                |
| P10-10-1-1-2 | Chongwe  | Farm 10    | Medium Scale     | Pig     | Pig nasal swab | Yes                |
| P10-10-1     | Chongwe  | Farm 10    | Medium Scale     | Pig     | Pig nasal swab | Yes                |
| P10-7-1      | Chongwe  | Farm 10    | Medium Scale     | Pig     | Pig nasal swab | Yes                |
| P10-6-1      | Chongwe  | Farm 10    | Medium Scale     | Pig     | Pig nasal swab | Yes                |
| P10-17-1     | Chongwe  | Farm 10    | Medium Scale     | Pig     | Pig nasal swab | Yes                |
| P10-23-1     | Chongwe  | Farm 10    | Medium Scale     | Pig     | Pig nasal swab | Yes                |
| P10-26-1     | Chongwe  | Farm 10    | Medium Scale     | Pig     | Pig nasal swab | Yes                |
| P10-9-1      | Chongwe  | Farm 10    | Medium Scale     | Pig     | Pig nasal swab | Yes                |
| P10-26-2     | Chongwe  | Farm 10    | Medium Scale     | Pig     | Pig nasal swab | Yes                |
| A1-6-1       | Chilanga | Abattoir 1 | Large Scale      | Pig     | Pig nasal swab | Yes                |
| A1-7-1       | Chilanga | Abattoir 1 | Large Scale      | Pig     | Pig nasal swab | Yes                |
| A1-12-1      | Chilanga | Abattoir 1 | Large Scale      | Pig     | Pig nasal swab | Yes                |
| A1-13-1      | Chilanga | Abattoir 1 | Large Scale      | Pig     | Pig nasal swab | Yes                |
| A1-22-1      | Chilanga | Abattoir 1 | Large Scale      | Pig     | Pig nasal swab | Yes                |
| AH1-1-1      | Chilanga | Abattoir 1 | Large Scale      | Pig     | Pig nasal swab | Yes                |
| P11-20-1     | Lusaka   | Farm 11    | Large Scale      | Pig     | Pig nasal swab | Yes                |
| P11-42-1     | Lusaka   | Farm 11    | Large Scale      | Pig     | Pig nasal swab | Yes                |
| P11-51-1     | Lusaka   | Farm 11    | Large Scale      | Pig     | Pig nasal swab | Yes                |
| P12-13-1     | Lusaka   | Farm 12    | Large Scale      | Pig     | Pig nasal swab | Yes                |
| P13-14-1     | Lusaka   | Farm 13    | Large Scale      | Pig     | Pig nasal swab | Yes                |
| P13-16-1     | Lusaka   | Farm 13    | Large Scale      | Pig     | Pig nasal swab | Yes                |
