# Supplementary material for: Antimicrobial Susceptibility Profiles and Molecular Characterisation of Staphylococcus aureus from Pigs and Workers at Farms and Abattoirs in Zambia
Source: MDPI journal article supplement (doi:10.3390/antibiotics11070844), 2022-06-24
Supplement: s1 [file s1]

Table S2: Vancomycin MICs of *S. aureus*\*

| Isolate ID | Sample Type    | Study Site | District | Vancomycin<br>(µg/mL) | MIC | Susceptibility** |
|------------|----------------|------------|----------|-----------------------|-----|------------------|
| P11-16     | Pig nasal swab | Farm 11    | Lusaka   | 1.5                   |     | Susceptible      |
| P11-17     | Pig nasal swab | Farm 11    | Lusaka   | 1.5                   |     | Susceptible      |
| P11-18     | Pig nasal swab | Farm 11    | Lusaka   | 1.5                   |     | Susceptible      |
| P11-22-1   | Pig nasal swab | Farm 11    | Lusaka   | 1.5                   |     | Susceptible      |
| P11-26     | Pig nasal swab | Farm 11    | Lusaka   | 1.5                   |     | Susceptible      |
| P11-27     | Pig nasal swab | Farm 11    | Lusaka   | 1.5                   |     | Susceptible      |
| P11-30     | Pig nasal swab | Farm 11    | Lusaka   | 1.5                   |     | Susceptible      |
| P11-39     | Pig nasal swab | Farm 11    | Lusaka   | 1.5                   |     | Susceptible      |
| P11-42-1   | Pig nasal swab | Farm 11    | Lusaka   | 1.5                   |     | Susceptible      |
| P11-43     | Pig nasal swab | Farm 11    | Lusaka   | 1.5                   |     | Susceptible      |
| P11-46     | Pig nasal swab | Farm 11    | Lusaka   | 1.5                   |     | Susceptible      |
| P11-46     | Pig nasal swab | Farm 11    | Lusaka   | 1.5                   |     | Susceptible      |
| P11-46-1   | Pig nasal swab | Farm 11    | Lusaka   | 1.5                   |     | Susceptible      |
| P11-50     | Pig nasal swab | Farm 11    | Lusaka   | 2.0                   |     | Susceptible      |
| P11-51     | Pig nasal swab | Farm 11    | Lusaka   | 1.5                   |     | Susceptible      |
| P11-51-1   | Pig nasal swab | Farm 11    | Lusaka   | 1.5                   |     | Susceptible      |
| P13-1      | Pig nasal swab | Farm 13    | Lusaka   | 1.5                   |     | Susceptible      |
| P13-2      | Pig nasal swab | Farm 13    | Lusaka   | 2.0                   |     | Susceptible      |
| P13-12     | Pig nasal swab | Farm 13    | Lusaka   | 1.5                   |     | Susceptible      |
| P13-16     | Pig nasal swab | Farm 13    | Lusaka   | 1.5                   |     | Susceptible      |
| P13-25     | Pig nasal swab | Farm 13    | Lusaka   | 1.5                   |     | Susceptible      |
| P13-33     | Pig nasal swab | Farm 13    | Lusaka   | 3.0                   |     | Susceptible      |
| P13-34     | Pig nasal swab | Farm 13    | Lusaka   | 1.5                   |     | Susceptible      |
| P13-50     | Pig nasal swab | Farm 13    | Lusaka   | 1.5                   |     | Susceptible      |
| P13-51     | Pig nasal swab | Farm 13    | Lusaka   | 1.5                   |     | Susceptible      |

\*All isolates tested were resistant to cefoxitin; \*\* Susceptibility was interpreted according to the 2020 Clinical and Laboratory Standards Institute (CLSI) guidelines [1]

#### References

- 1 Clinical and Laboratory Standards Institute. Performance Standards for Antimicrobial Susceptibility Testing. 30th ed. CLSI supplement M1002020.
