# Supplementary material for: Antimicrobial Susceptibility Profiles and Molecular Characterisation of Staphylococcus aureus from Pigs and Workers at Farms and Abattoirs in Zambia
Source: MDPI journal article supplement (doi:10.3390/antibiotics11070844), 2022-06-24
Supplement: s1 [file s1]

Table S3: Characteristics of *S. aureus* Isolates Sequenced for *Spa* typing

| Spa type | Isolate ID | Sample type      | Study site | Type of Facility* | District | Resistance Phenotype |
|----------|------------|------------------|------------|-------------------|----------|----------------------|
| t1430    | P3-10      | Pig nasal swab   | Farm 3     | Large scale       | Chongwe  | P+E+CD+Cip           |
| t1430    | P3-23      | Pig nasal swab   | Farm 3     | Large scale       | Chongwe  | P+Cip                |
| t1430    | P12-30     | Pig nasal swab   | Farm 12    | Large scale       | Lusaka   | P+E+C+Cip            |
| t1430    | P10-12     | Pig nasal swab   | Farm 10    | Medium scale      | Chongwe  | P+Cip                |
| t1430    | AH1-4      | Human hand swab  | Abattoir 1 | Large scale       | Chilanga | P+Cip                |
| t1430    | A1-13-1    | Pig nasal swab   | Abattoir 1 | Large scale       | Chilanga | P+Cip                |
| t1430    | A1-10      | Pig nasal swab   | Abattoir 1 | Large scale       | Chilanga | P+C+Cip              |
| t1430    | A1-1       | Pig nasal swab   | Abattoir 1 | Large scale       | Chilanga | P+Cip                |
| t1430    | P10-4-1    | Pig nasal swab   | Farm 10    | Medium scale      | Chongwe  | P+Cip                |
| t1430    | P10-9      | Pig nasal swab   | Farm 10    | Medium scale      | Chongwe  | P                    |
| t1430    | A1-2       | Pig nasal swab   | Abattoir 1 | Large scale       | Chilanga | P+Cip                |
| t1430    | AH1-1-1    | Human hand swab  | Abattoir 1 | Large scale       | Chilanga | P+Te+Cip             |
| t034     | P13-25     | Pig nasal swab   | Farm 13    | Large scale       | Lusaka   | CX+P+E+Te            |
| t034     | A2-11      | Pig nasal swab   | Abattoir 2 | Large scale       | Chilanga | P+Te+SXT             |
| t034     | A2-10      | Pig nasal swab   | Abattoir 2 | Large scale       | Chilanga | P+Te+SXT             |
| t034     | P7-39      | Pig nasal swab   | Farm 7     | Medium scale      | Chongwe  | Te                   |
| t034     | A3-2       | Pig nasal swab   | Abattoir 3 | Medium scale      | Lusaka   | Te                   |
| t034     | A2-6       | Pig nasal swab   | Farm 2     | Large scale       | Chongwe  | P+Te                 |
| t034     | A3-6       | Pig nasal swab   | Abattoir 3 | Medium scale      | Lusaka   | P+Te                 |
| t318     | P2-2       | Pig nasal swab   | Farm 2     | Medium scale      | Chilanga | P                    |
| t318     | P6-28      | Pig nasal swab   | Farm 6     | Medium scale      | Chongwe  | P                    |
| t318     | P7-3       | Pig nasal swab   | Farm 7     | Medium scale      | Chongwe  | P+Te                 |
| t318     | P7-6       | Pig nasal swab   | Farm 7     | Medium scale      | Chongwe  | P+Te                 |
| t318     | P4-12      | Pig nasal swab   | Farm 4     | Medium scale      | Lusaka   | Susceptible to all   |
| t084     | A2H-10     | Human nasal swab | Abattoir 2 | Large scale       | Chilanga | P+Te                 |
| t571     | P1-8       | Pig nasal swab   | Farm 1     | Medium scale      | Chilanga | P+Te                 |
| t899     | H6-4       | Human nasal swab | Farm 6     | Medium scale      | Chongwe  | P                    |
| Unknown  | P4-4       | Pig nasal swab   | Farm 4     | Medium scale      | Lusaka   | P                    |
| Unknown  | P4-8       | Pig nasal swab   | Farm 4     | Medium scale      | Lusaka   | P                    |
| Unknown  | P11-48     | Pig nasal swab   | Farm 11    | Large scale       | Lusaka   | CX+P                 |
| Unknown  | P7-1       | Pig nasal swab   | Farm 7     | Medium scale      | Chongwe  | P+Te                 |
| Unknown  | H1-2       | Human hand swab  | Farm 1     | Medium scale      | Chilanga | P+Te                 |
| Unknown  | H3-13      | Human hand swab  | Farm 3     | Medium scale      | Chongwe  | P+E+CD+Cip           |
| Unknown  | P7-4       | Pig nasal swab   | Farm 7     | Medium scale      | Chongwe  | P                    |
| Unknown  | P1-5       | Pig nasal swab   | Farm 1     | Medium scale      | Chilanga | P                    |
| Unknown  | P4-2       | Pig nasal swab   | Farm 4     | Medium scale      | Lusaka   | P                    |
| Unknown  | P4-1       | Pig nasal swab   | Farm 4     | Medium scale      | Lusaka   | P                    |
| Unknown  | A2-13      | Pig nasal swab   | Abattoir 2 | Large scale       | Chilanga | P                    |
| Unknown  | A2-18      | Pig nasal swab   | Abattoir 2 | Large scale       | Chilanga | P                    |
| Unknown  | A2-19      | Pig nasal swab   | Abattoir 2 | Large scale       | Chilanga | P                    |
| Unknown  | P5-18      | Pig nasal swab   | Farm 5     | Medium scale      | Lusaka   | P                    |
| Unknown  | P7-33      | Pig nasal swab   | Farm 7     | Medium scale      | Chongwe  | P+Te+Cip             |
| Unknown  | P10-10-1   | Pig nasal swab   | Farm 10    | Medium scale      | Chongwe  | P+CD+Te              |

\*Type of facility: Small scale (less than 100 pigs), medium scale (100 to 500 pigs) and commercial scale (greater than 500 pigs);
